# Supplementary material for: High prevalence and incidence of human papillomavirus in a cohort of healthy young African female subjects
Source: PubMed Central journal article supplement — Sex Transm Infect. 2013 Mar 13;89(5):358–65. doi: 10.1136/sextrans-2012-050685 (PMC3717757; doi:10.1136/sextrans-2012-050685), 2013-03-13
Supplement: sextrans-2012-050685-s1.pdf [file sextrans-2012-050685-s1.pdf]

**Supplemental Figure 1. Prevalence of HPV infection (any type) by age<sup>1</sup>**

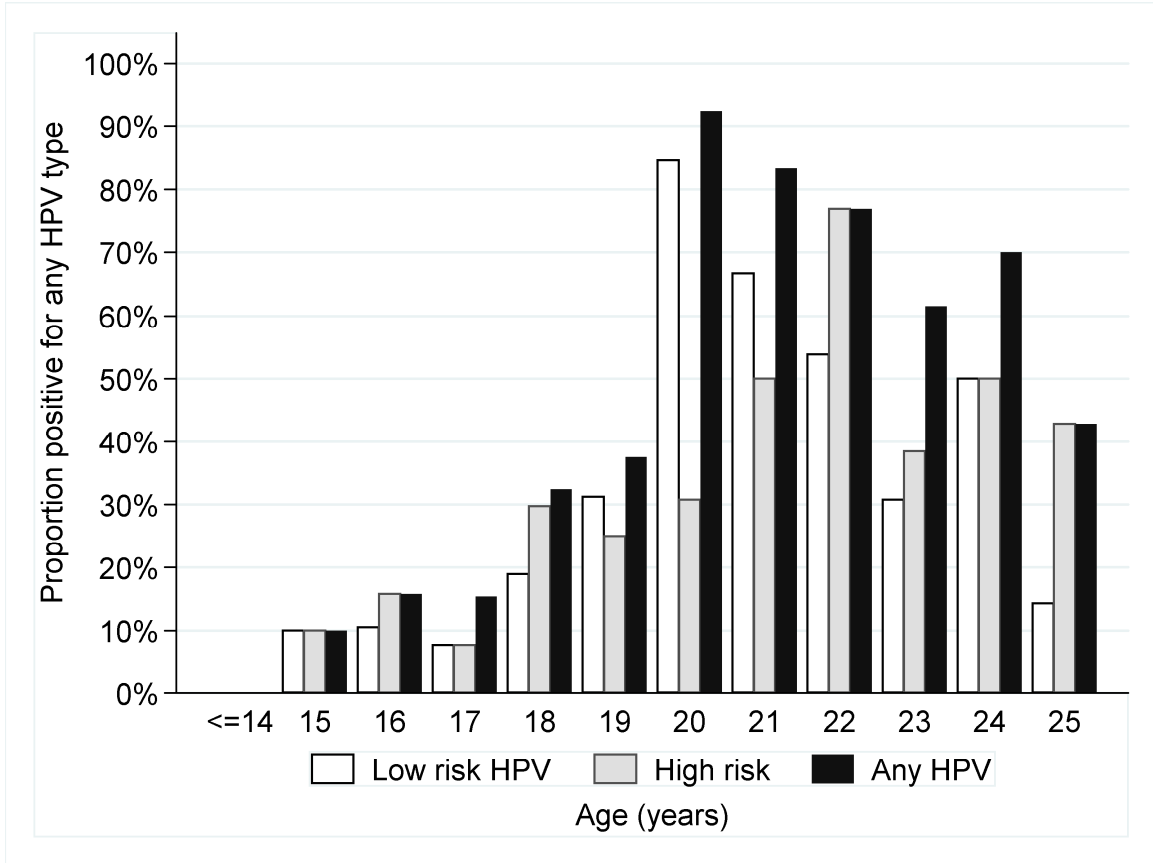

<sup>1</sup> Prevalence in all girls, assuming that girls who report being non-sexually active are negative for all serotypes. No girls under age 13 reported being sexually active.
